# Supplementary material for: Histo-Molecular Factors of Response to Combined Chemotherapy and Immunotherapy in Non-Small Cell Lung Cancers
Source: Springer Nature journal article supplement (doi:10.1007/s11523-023-01009-w), 2023-11-01
Supplement: MOESM1 [file 26260292]

# **Histo-Molecular Factors of Response to Combined Chemotherapy and Immunotherapy in Non-small cell Lung Cancers**

Marchal Marine<sup>1</sup> ; Leroy Vincent<sup>2</sup> ; Behal H  l  ne<sup>3</sup> ; Dansin Eric<sup>4</sup> ; Paris Nicolas<sup>5</sup> ; Bordier Soraya<sup>6</sup> ; Humez Sarah<sup>7,8</sup> ; Escande Fabienne<sup>9</sup> ; Gauvain Cl  ment<sup>1</sup> ; Cortot Alexis B.<sup>1,8</sup>

<sup>1</sup> Univ. Lille, CHU Lille, Department of Thoracic Oncology, Lille, France;

<sup>2</sup> Department of Pneumology, Clinique Tessier, Valenciennes, France;

<sup>3</sup> CHU Lille, Biostatistics Department, Lille, France;

<sup>4</sup> Department of Medical Oncology, Centre Oscar Lambret, Lille, France;

<sup>5</sup> Department of Pneumology, Dunkerque Hospital, Dunkerque, France;

<sup>6</sup> Department of Pneumology, Roubaix Hospital, Roubaix, France;

<sup>7</sup> Univ. Lille, CHU de Lille, Department of Pathology, Lille, France;

<sup>8</sup> Univ. Lille, CHU Lille, CNRS, Inserm, Institut Pasteur de Lille, UMR9020 – UMR1277 – Canther – Cancer Heterogeneity, Plasticity and Resistance to Therapies, Lille, France;

<sup>9</sup> Univ. Lille, CHU de Lille, Department of Biochemistry and Molecular Biology, Lille, France.

Corresponding author:

Marine Marchal

CHU Lille, Thoracic Oncology Department

Boulevard du Professeur Leclercq, 59000, Lille, France

Tel: +33 3 20 44 56 12

Fax: +33 3 20 44 56 11

Email: [marine.marchal@chu-lille.fr](mailto:marine.marchal@chu-lille.fr)

# SUPPLEMENTARY MATERIEL

## Supplementary Figure A

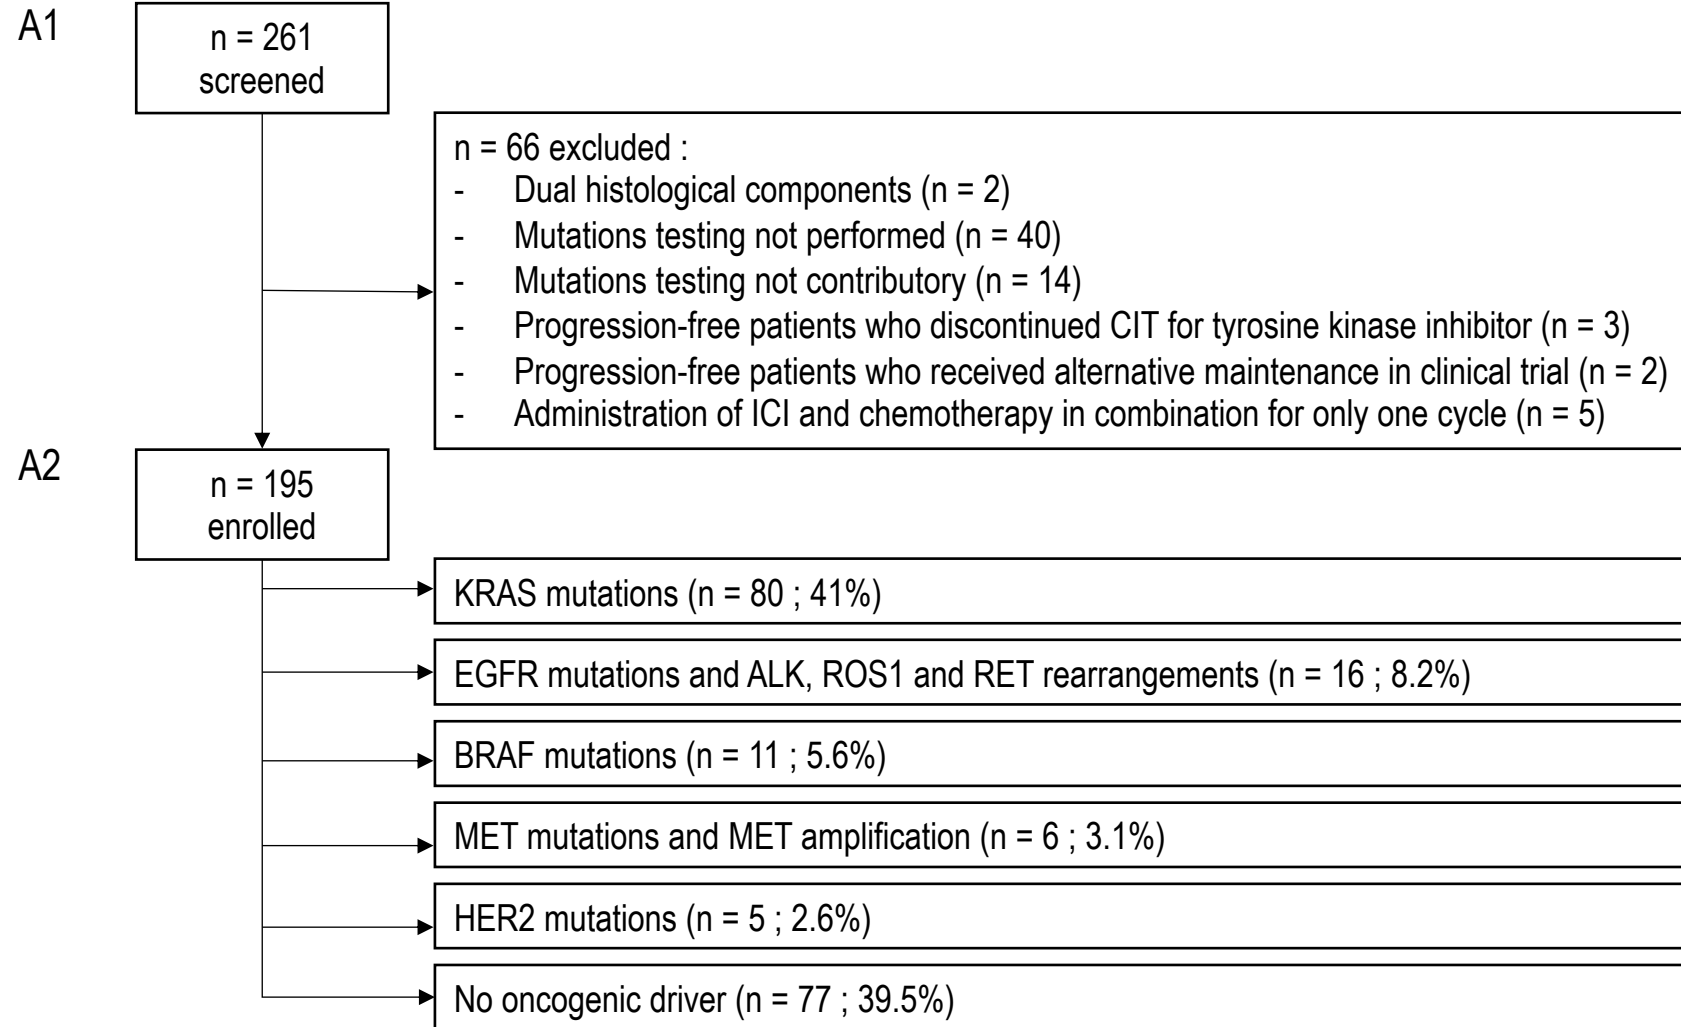

A. Flowchart of the study population (A1) and distribution of oncogenic drivers subgroups (A2)

Supplementary Figure B

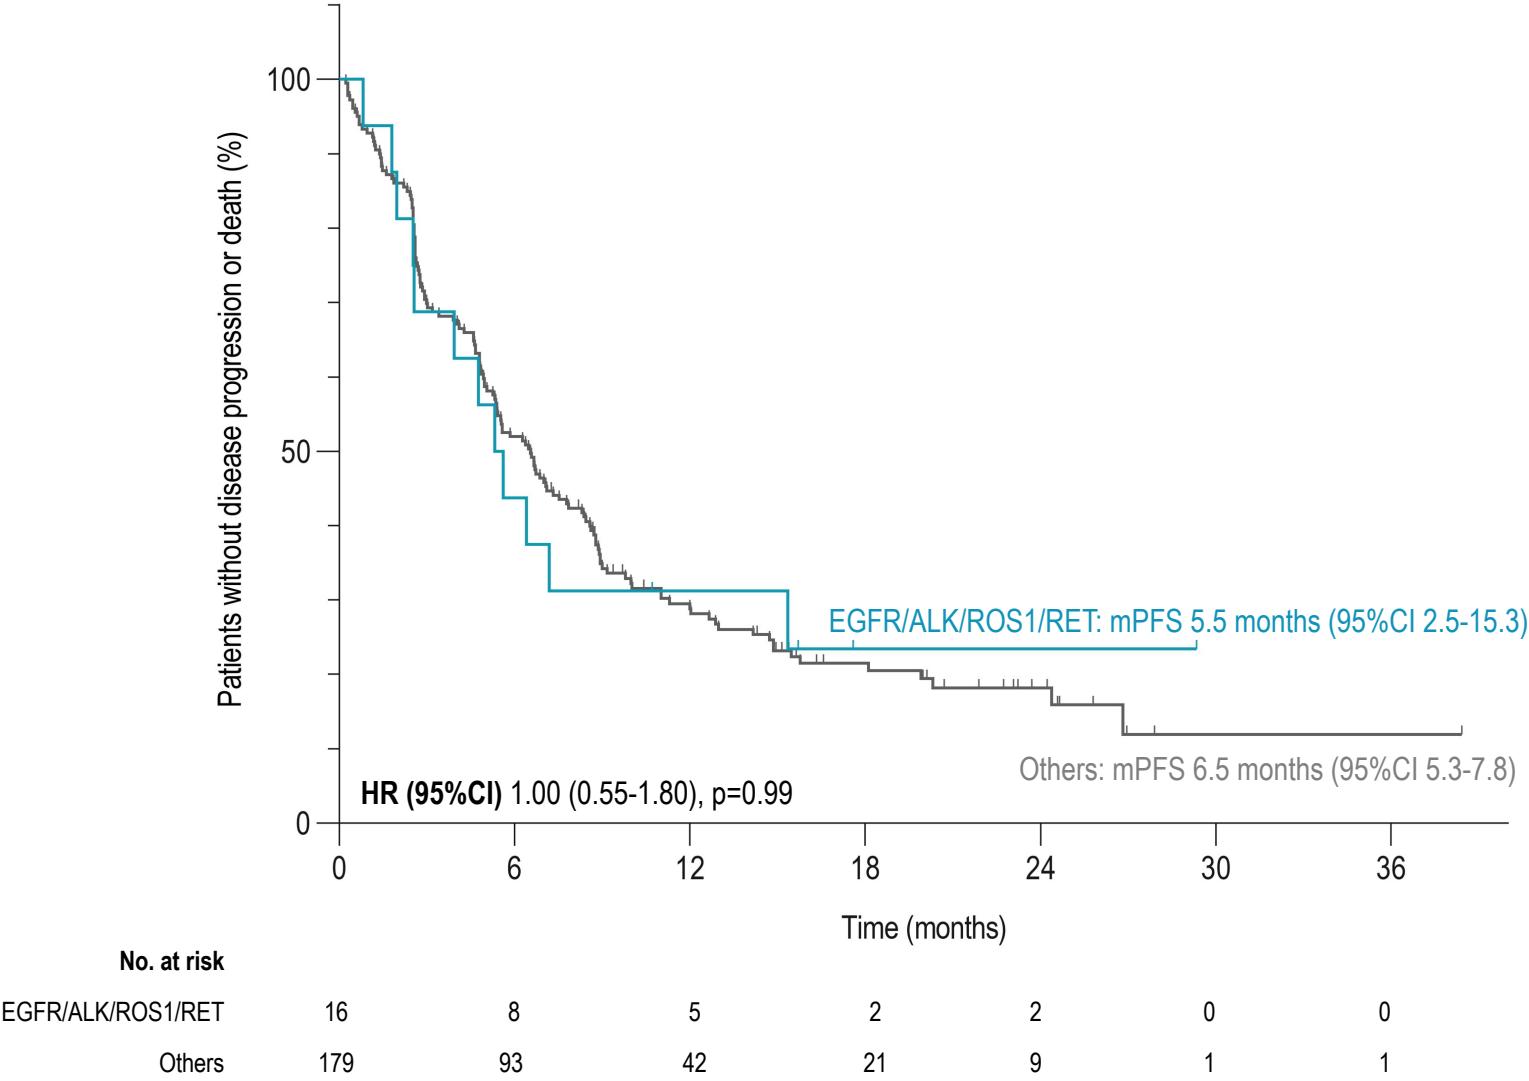

B. Kaplan-Meier curves of progression-free survival in EGFR/ALK/ROS1/RET subgroup and in other patients

Supplementary Figure C

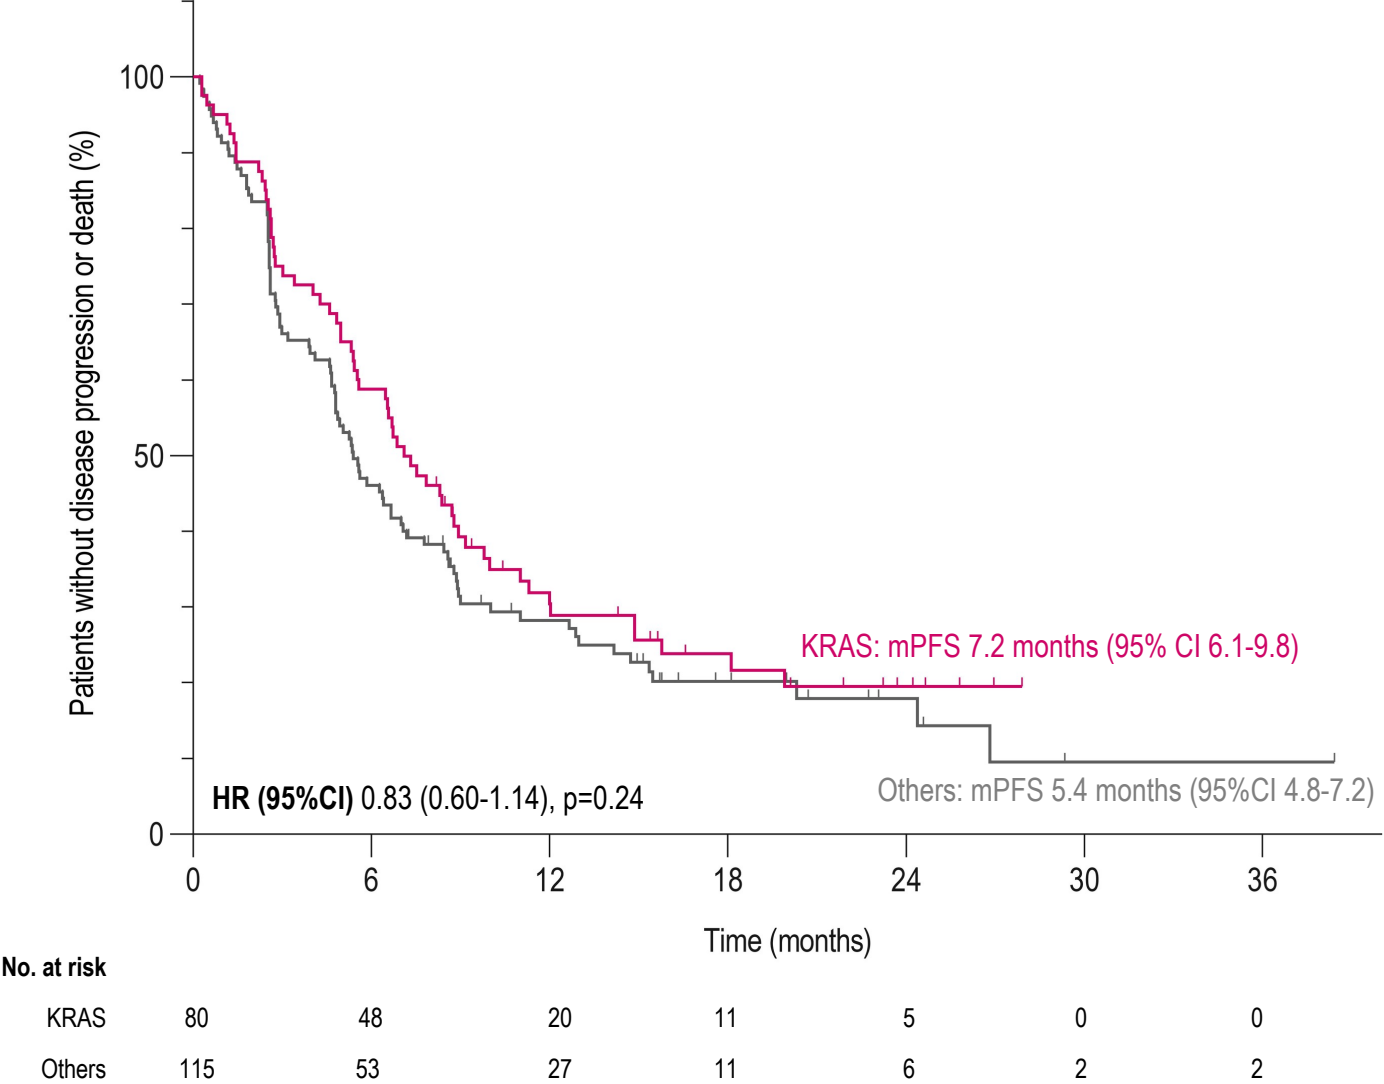

C. Kaplan-Meier curves of progression-free survival in KRAS subgroup and in other patients

Supplementary Figure D

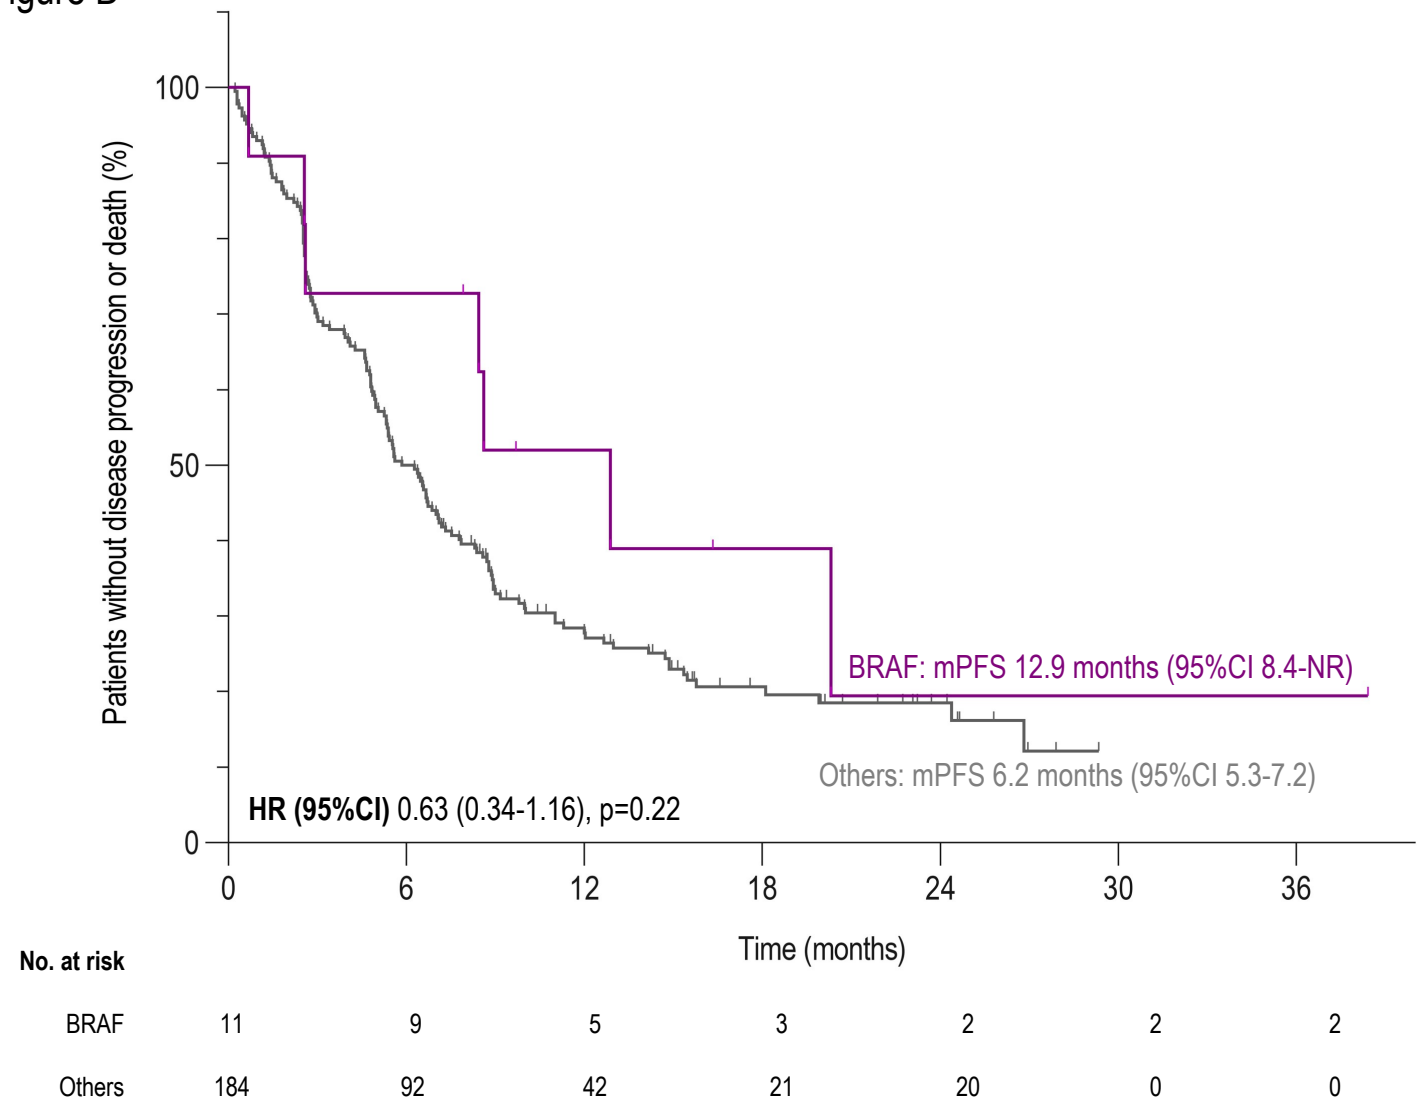

D. Kaplan-Meier curves of progression-free survival in BRAF subgroup and in other patients

Supplementary Figures E

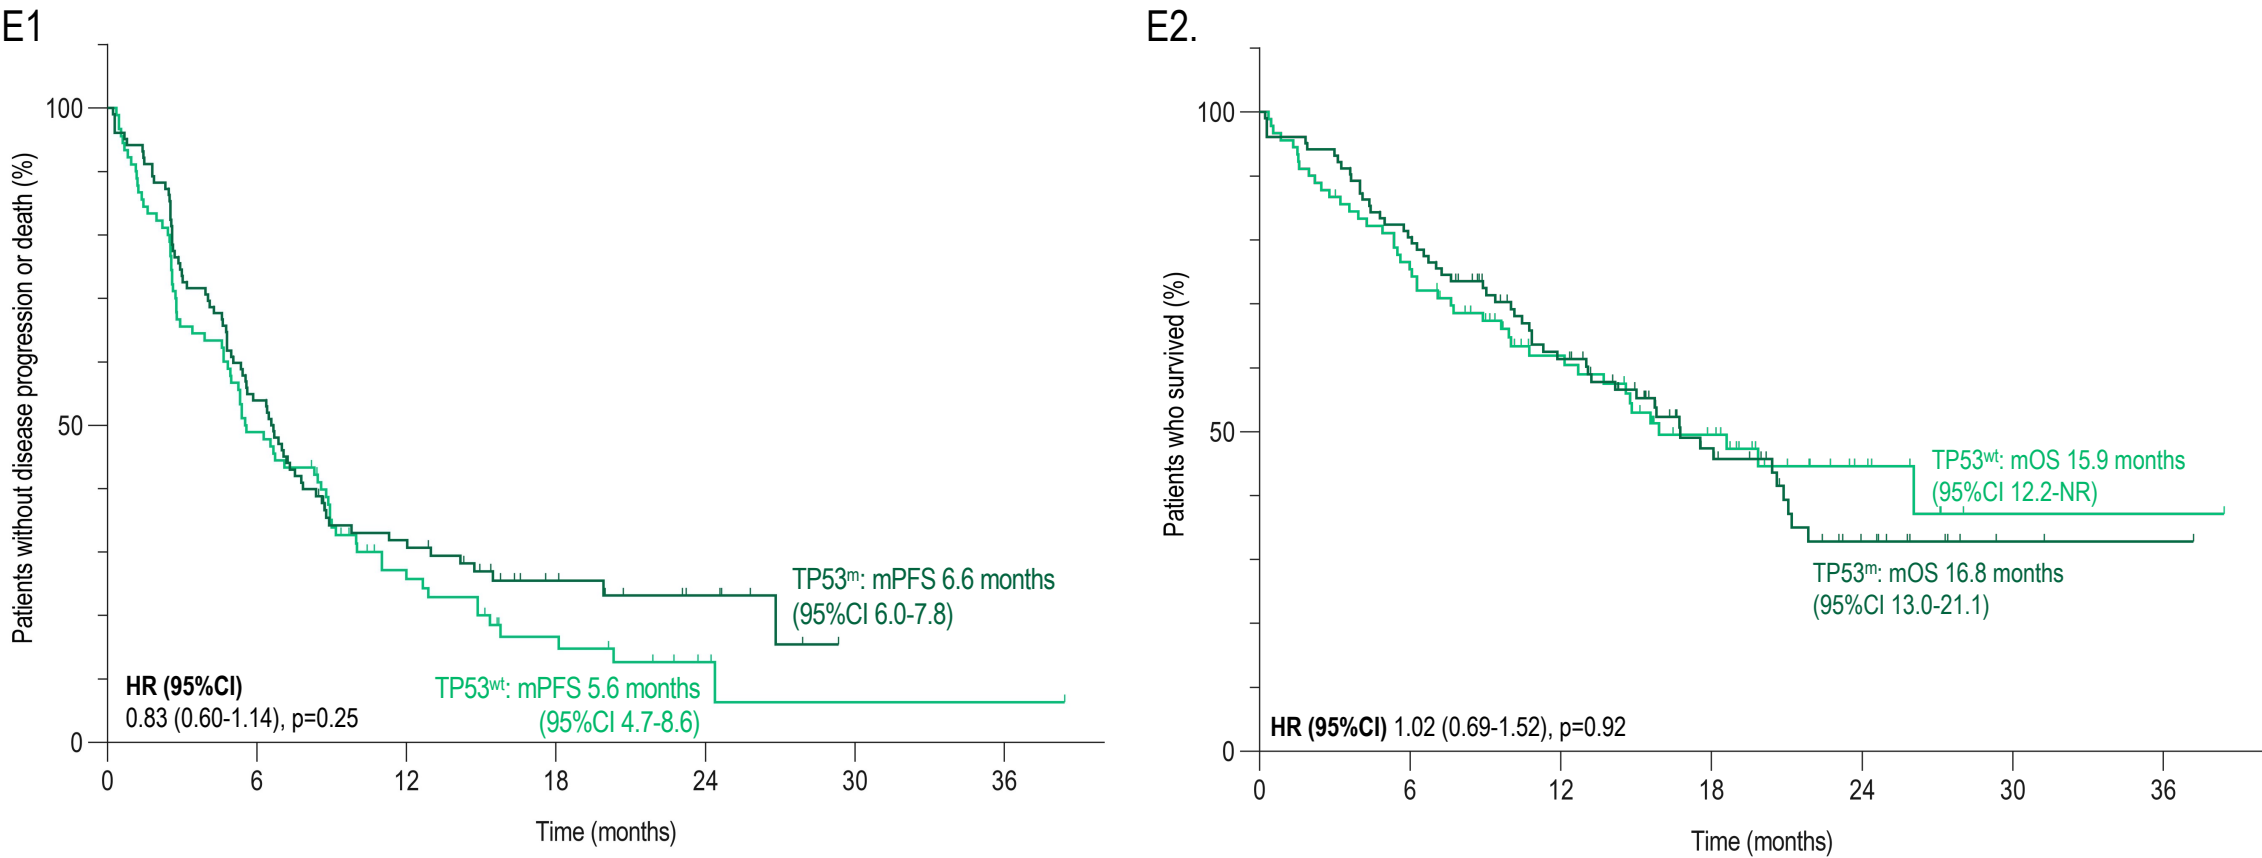

E. Kaplan-Meier curves of progression-free survival (E1) and overall survival (E2) according to inactivating TP53 mutations.

TP53m, TP53-mutated patients; TP53wt, TP53 wild-type patients

Supplementary Figure F

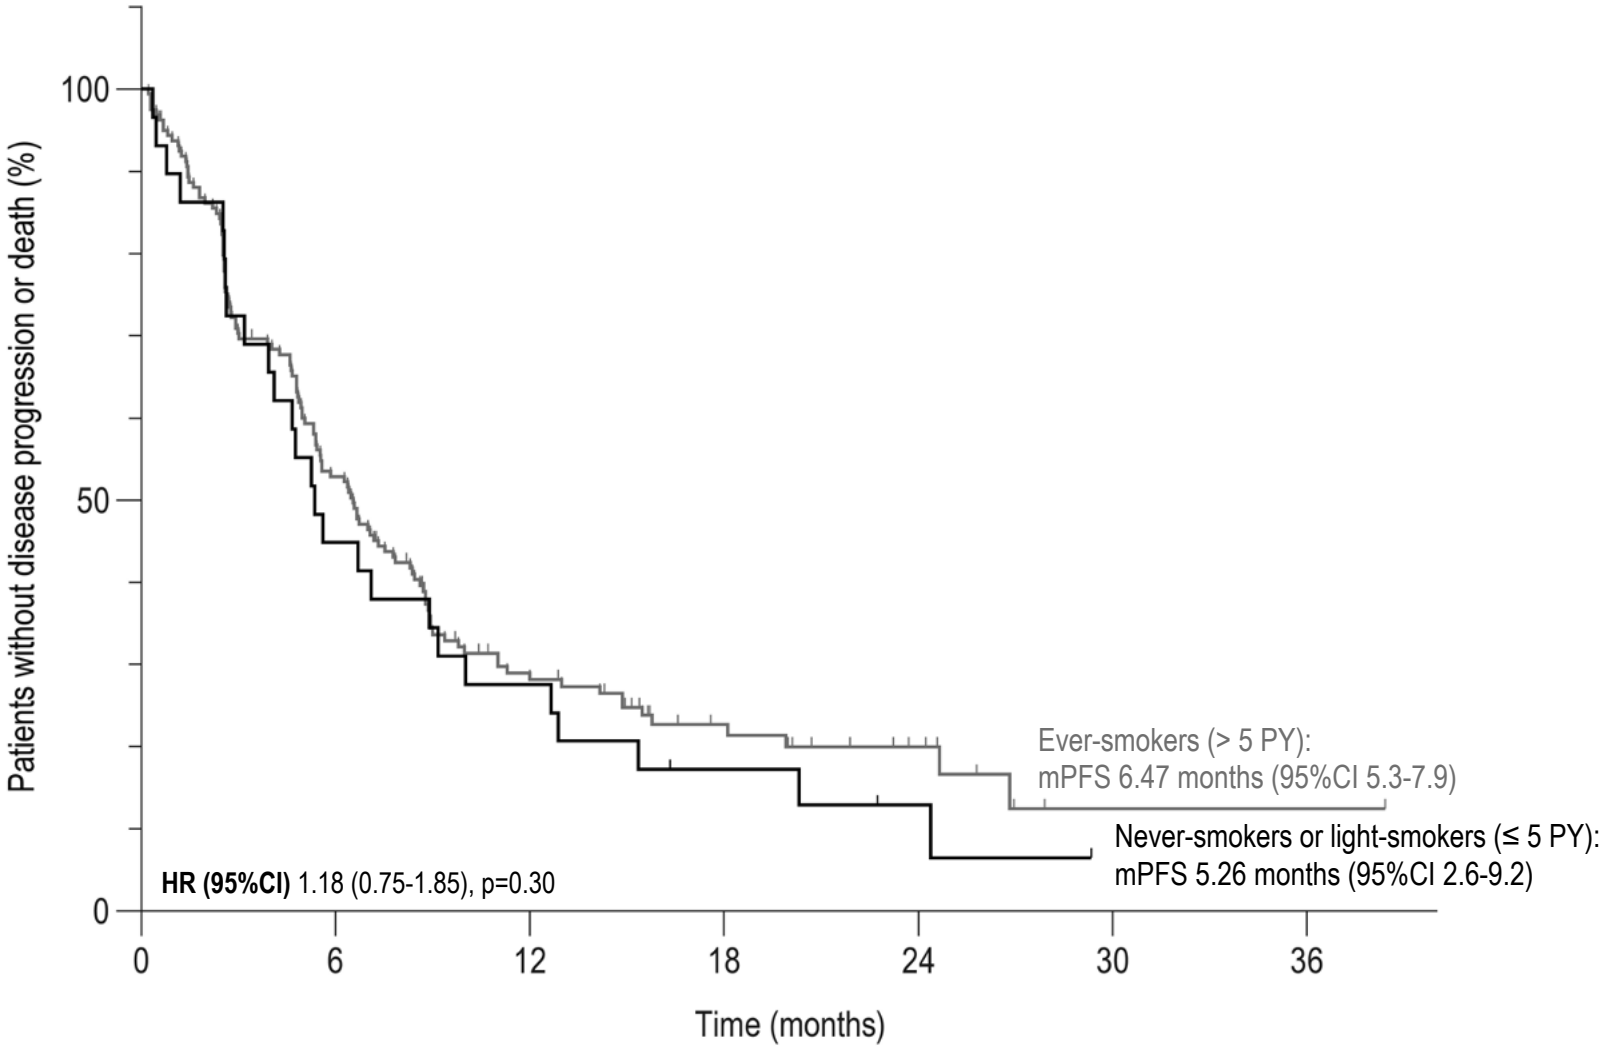

F. Kaplan-Meier curves of progression-free survival according to smoking status  
PY, pack-years
